1 ***rTPC* and *nls.multstart*: a new pipeline to fit thermal**  
2 **performance curves in *R*.**

3 **Running headline:** New pipeline to fit thermal performance curves

4

5 **Author(s) Affiliations:**

6

7 Daniel Padfield<sup>1\*</sup>, Hannah O’Sullivan<sup>2</sup>, & Samraat Pawar<sup>2</sup>

8 <sup>1</sup>College of Life and Environmental Sciences, Environment and Sustainability Institute, University of

9 Exeter, Penryn, Cornwall, TR10 9EZ, U.K.

10 <sup>2</sup>Department of Life Sciences, Imperial College London, Silwood Park Campus, Buckhurst Road, Ascot,

11 Berkshire, SL5 7PY, U.K.

12

13 **Corresponding author:** Daniel Padfield [d.padfield@exeter.ac.uk](mailto:d.padfield@exeter.ac.uk)

14

15 **Manuscript type:** Application

16

17 **Word count:** 2980 including references and figure and table legends.

18 **Abstract**

19 1. The quantification of thermal performance curves (TPCs) for biological rates has many  
20 applications to problems such as predicting species' responses to climate change. There is  
21 currently no widely used open-source pipeline to fit mathematical TPC models to data, which  
22 limits the transparency and reproducibility of the curve fitting process underlying applications  
23 of TPCs.

24 2. We present a new pipeline in *R* that currently allows for reproducible fitting of 24 different  
25 TPC models using non-linear least squares (NLLS) regression. The pipeline consists of two  
26 packages – *rTPC* and *nls.multstart* – that allow multiple start values for NLLS fitting and  
27 provides helper functions for setting start parameters. This pipeline overcomes previous  
28 problems that have made NLLS fitting and estimation of key parameters difficult or unreliable.

29 3. We demonstrate how *rTPC* and *nls.multstart* can be combined with other packages in *R* to  
30 robustly and reproducibly fit multiple models to multiple TPC datasets at once. In addition, we  
31 show how model selection or averaging, weighted model fitting, and bootstrapping can easily  
32 be implemented within the pipeline.

33 4. This new pipeline provides a flexible and reproducible approach that makes the challenging  
34 task of fitting multiple TPC models to data accessible to a wide range of users.

35

36 **Key words:** non-linear least-squares, regression, thermodynamic models, thermal performance  
37 curves, thermal tolerance curves, reaction norms

38

## 39 1. Introduction

40 Thermal performance curves (TPCs) describe how biological rates such as growth, photosynthesis  
41 and respiration change with temperature. TPCs (and the parameters that underpin them) have been  
42 used widely in biology, from studying thermal adaptation (Schaum et al., 2017; Smith et al., 2019),  
43 to predicting ectotherm range shifts (Sunday, Bates, & Dulvy, 2012; Sinclair et al., 2016) and  
44 changes in disease dynamics (Molnár, Kutz, Hoar, & Dobson, 2013; Cohen et al., 2017; Mordecai  
45 et al., 2019) under expected climate change. Despite their wide use across ecology and evolution,  
46 there is no open-source, flexible approach available to fit TPC models to data (henceforth simply  
47 “fit TPCs”) that allows for reproducible fitting using NLLS. Current software for fitting TPCs,  
48 such as the *R* packages *temperatureresponse* (Low-Décarie et al., 2017) and *devRate* (Rebaudo,  
49 Struelens, & Dangles, 2018), do not address the well-known sensitivity of NLLS algorithms to  
50 parameter starting values, which is exacerbated when fitting multiple models with varying non-  
51 linearities, and to multiple datasets with differences in sampling, rate measurements and coverage  
52 of temperature ranges. Moreover, these existing packages do not address robust quantification of  
53 parameter uncertainty.

54 Many different mathematical models have been used to fit TPCs (Krenek, Berendonk, &  
55 Petzoldt, 2011; DeLong et al., 2017; Low-Décarie et al., 2017) which can make it difficult to  
56 determine the “best” model for any given dataset. A few papers have evaluated the performance  
57 of TPC models (Angilletta Jr, 2006; Shi & Ge, 2010; Krenek et al., 2011). The most comprehensive  
58 analysis to date compared 12 models, and demonstrated how model choice alters the predicted  
59 species-level response to temperature (Low-Décarie et al., 2017). However, using model selection  
60 to select the best or most appropriate model for specific datasets remains rare (but see Montagnes,  
61 Morgan, Bissinger, Atkinson, & Weisse, 2008). Instead, a single model is used, often chosen for

62 its mechanistic underpinnings, despite little agreement about the mechanistic links between  
63 enzyme kinetics and emergent biological rates (e.g. velocity, feeding rate, growth rate). Others  
64 prefer to use a model that directly estimates desired parameters (e.g. optimum temperature). There  
65 is likely no “best” model to use for fitting TPCs, with different models proving the most  
66 appropriate for different biological processes, taxa, and levels of data quality. Consequently, a new  
67 analysis pipeline that allows users to fit TPCs, while remaining flexible to the research question  
68 being asked, is sorely needed.

69         Here, we present *rTPC* and *nls.multstart*; two open-source *R* packages that provide the  
70 basis for a pipeline to robustly and reproducibly fit TPCs. The pipeline allows the fitting of 24  
71 different TPC model formulations, and we demonstrate how multiple models can be fitted to the  
72 same curve, as well as how multiple datasets can be fitted. We also describe helper functions within  
73 *rTPC* for the estimation of start parameters, upper and lower parameter limits, and commonly-  
74 used parameters (e.g. optimum temperature, activation energy or  $Q_{10}$ ). Finally, we illustrate how  
75 this pipeline can be used for model selection and model averaging, as well as how weighted model  
76 fitting and bootstrapping implemented using *rTPC* can be used to account for parameter and model  
77 uncertainty.

78

## 79 **2. Pipeline overview**

80 The goal of *rTPC* and the associated pipeline is to make fitting TPCs easier and repeatable.  
81 Extensive examples of the pipeline can be found at <https://padpadpadpad.github.io/rTPC> where all  
82 vignettes are available. When developing *rTPC*, we made a conscious decision not to repeat code  
83 and methods that are already optimised and available in the *R* ecosystem. Instead, they are utilised  
84 and incorporated into the pipeline.

85

## 86 **2.1 Models contained in *rTPC***

87 *rTPC* contains 24 mathematical TPC models (Table S1). Most models are named after the author  
88 that first formulated the model and the year of its first use (e.g. *thomas\_2012()*). A list of all models  
89 in *rTPC* can be accessed using *get\_model\_names()*. Models can be characterised by whether they  
90 appropriately model negative rates before and after the optimum temperature (Table S1).

91

## 92 **2.2 NLLS fitting using multiple start parameters using *nls.multstart***

93 The Gauss-Newton (implemented in *nls*) and the Levenberg-Marquardt (implemented in  
94 *minpack.lm::nlsLM*) NLLS fitting algorithms are sensitive to the choice of starting values for the  
95 model parameters. This sensitivity can result in differences in parameter estimates between  
96 separate fitting attempts for the same dataset, or a complete failure to fit the model (the  
97 optimisation does not converge). To address this, the *R* package *nls.multstart* – and its only  
98 function *nls\_multstart()* - generates multiple start values and fits many iterations of the model  
99 using the Levenberg-Marquardt algorithm implemented in *nlsLM*. The best model is then picked  
100 and returned using Akaike's Information Criterion corrected for small sample size (AICc)  
101 (Padfield & Matheson, 2018).

102

## 103 **2.3 Estimating starting parameter values and limits for fitting TPCs using *rTPC***

104 *rTPC* helper functions *get\_start\_vals()*, *get\_lower()* and *get\_upper()* aid in the specification of  
105 sensible start values and limits that can be used by *nls\_multstart()* (or *nls* and *nlsLM*). These  
106 functions return values for the desired model, which is specified using the argument *model\_name*.  
107 Where possible, the model's starting parameter values are estimated from the data. In all other

108 instances, start values are the average fitted parameters from studies that used that equation. Upper  
109 and lower limits are set at biologically implausible values. If these helper functions aren't needed,  
110 values can be set manually.

111

## 112 **2.4 Calculating derived TPC parameters**

113 Parameters of TPCs (such as optimum temperature or  $Q_{10}$ ) are commonly used in downstream  
114 analyses (e.g. to determine if optimum temperature correlates with local climate across taxa).  
115 However, the best-fitting model's parameters may not include the parameter of interest. *rTPC* has  
116 helper functions, such as *get\_topt()* and *get\_rmax()*, that numerically calculate most parameters of  
117 interest from any fitted TPC (Table 1). These derived parameters are calculated from high  
118 resolution predictions (0.001°C intervals) of the fitted model. The function *calc\_params()* returns  
119 values for all 11 derived parameters in a dataframe (Table 1). *calc\_params()* does not return  
120 estimates of uncertainty in these derived parameters, which we address below (section 3.3).

121

## 122 **3. Uses for the *rTPC* pipeline**

123 Below we give examples of potential applications and extensions to the pipeline, why they are  
124 important, and guidance as to how they can be incorporated.

125

### 126 **3.1 Model selection and model averaging**

127 The “best” model for one dataset is not necessarily the best across other datasets. Our pipeline  
128 provides a flexible approach to help with model selection. For example, after fitting a number of  
129 potential models, AICc scores can be used to rank the models for each individual curve fit and  
130 pick the best overall model across all curves in a dataset. Alternatively, one may choose the best

131 model specific to each TPC, or use model averaging to obtain an overall TPC curve and parameter  
132 estimates by weighting each model's fit by its AICc (Figure 2).  
133 *vignette("model\_selection\_averaging")* provides an example of how to implement model  
134 selection and model averaging.

135

### 136 **3.2 Data-weighted TPC model fitting**

137 Due to non-independence of replicate rate measurements across temperatures, the mean rate at  
138 each temperature is often taken before fitting the TPC. This approach ignores variation in  
139 measurement values at each temperature. Incorporating variation in measurement errors across  
140 temperatures can be essential to improving the model fit and reducing biases in parameter  
141 estimates (Figure 2) (Davison & Hinkley, 1997). This can be implemented using weighted NLLS  
142 fitting, which can be applied using most methods of fitting NLLS in *R*. The optimal way to apply  
143 weights is to use *1/standard deviation*, which must be included as a vector the same length as the  
144 sample size. *vignette("model\_weighting")* provides an example of how to implement weighted  
145 NLLS when fitting TPCs.

146

### 147 **3.3 Quantifying uncertainty in model fits and parameter estimates**

148 Quantifying uncertainty in the TPC model fit as a whole and the estimated parameters is  
149 challenging. The recommended method is to calculate confidence intervals around model  
150 parameters of the TPC by constructing the likelihood profile of the parameters (most commonly  
151 done by using *stats::confint* which invokes *MASS::confint.nls* or *nlstools::confint2* (Baty et al.,  
152 2015)). However, in many instances the profiling (a numerical method) does not converge or the  
153 likelihood profile that emerges is asymmetric or skewed. Consequently, parameter and model

154 prediction confidence intervals of TPCs calculated in this way can be unreliable. Moreover,  
155 although profiling returns confidence intervals of the model parameters, this method cannot  
156 calculate the uncertainty in derived parameters (section 2.4).

157         Bootstrapping is a robust alternative to computing both the parameter and model prediction  
158 confidence intervals. Non-parametric bootstrapping entails resampling a dataset repeatedly and re-  
159 fitting the model to reconstruct a relatively unbiased sampling distribution of the parameters.  
160 Parameter confidence bounds can then be constructed using this distribution. Bootstrapping can  
161 also be used to calculate confidence intervals of derived parameters. The *rTPC* workflow uses the  
162 *Boot()* function from the *R* package *car* (Fox, 2006), which implements two types of non-  
163 parametric bootstrapping: case and residual resampling. In case resampling the data themselves  
164 are sampled (with replacement) to create a distribution of resampled parameter estimates, while  
165 residual bootstrapping uses mean centred residuals to create the distribution. Both methods have  
166 their pros and cons, and we leave it to the user to decide which one to use (or evaluate their  
167 performance for fitting TPCs). Non-overlapping confidence intervals of parameters between  
168 different TPCs may be used for inference, but these should be treated with caution for TPCs as  
169 datasets are often too small, making this type of inference unreliable.  
170 *vignette("bootstrapping\_models")* provides an example of how to implement bootstrapping for  
171 TPC models using *rTPC* and *car::Boot()*.

172         Finally, data-weighted TPC fitting (section 3.2) can be combined with bootstrapping to  
173 potentially yield both unbiased parameter estimates and better estimates of uncertainty. *car::Boot()*  
174 now supports both case and residual resampling for weighted NLLS and  
175 *vignette("weighted\_bootstrapping")* provides an example of how to implement this when fitting  
176 TPCs.



177

## 178 **4. Key considerations when fitting TPCs**

179 Effective fitting of TPCs depends on decisions made during experimental design, data collection,  
180 and model choice.

181

### 182 **4.1 Data considerations**

183 For effective fitting of TPCs, the number of unique temperature values used, the level of replication  
184 at each temperature, and the temperature range, all need to be considered. In the (common)  
185 scenario where all three cannot be maximised, the objective of the TPC fitting - and the parameters  
186 of particular interest - need to be considered. For example, in thermodynamic models, if the  
187 objective is to quantify the activation energy accurately, thermal range can be traded off for a finer  
188 degree of temperature resolution in the operational temperature range of the study organism  
189 (Pawar, Dell, Savage, & Knies, 2016). It is particularly important to consider the level of  
190 replication at each temperature: sampling multiple individuals at each temperature can give  
191 multiple individual TPCs of a population.

192

### 193 **4.2 Which models to fit**

194 The decision on which TPC models to fit largely depends on the type and quality of data, and the  
195 questions being asked. In terms of the data, there need to be at least  $k + 1$  points for fitting a model,  
196 where  $k$  is the number of model parameters. However, in NLLS fitting, the minimum number of  
197 data points needed to reliably fit a model to data can vary with the mathematical structure of the  
198 model (Burnham & Anderson, 2002), so in general, “the more the merrier”. Carefully consider  
199 what model(s) you want to use before starting the analysis. If there are negative rate values, it is

200 wise to fit models that can cross the x-axis both below and above the optimum temperature, such  
201 as *thomas\_2012()*, *thomas\_2017()* or *joehnk\_2008()* (Table S1). In terms of the questions being  
202 asked, if there are specific traits of interest (e.g. optimum temperature), it may be beneficial to  
203 only consider models that explicitly include that parameter in their formulation. This may be  
204 especially pertinent for the activation energy, deactivation energy, and  $Q_{10}$ , as they are sensitive to  
205 the calculation of the optimum temperature when calculated from model predictions. Finally,  
206 because NLLS is a numerical (inexact) model fitting method, consider carefully the correlations  
207 and mathematical relationships between parameters that may result in spurious parameter  
208 estimates (e.g. Kontopoulos, García-Carreras, Sal, Smith, & Pawar, 2018 in the case of the Sharpe-  
209 Schoolfield model)

210

## 211 **5. Concluding remarks and future improvements**

212 The pipeline presented here allows the user to fit TPCs in a simple, reproducible, and flexible  
213 framework. *rTPC* includes 24 model formulations previously used in the literature and  
214 *nls.multstart* provides a reliable method to fit non-linear models using multiple start values. It is  
215 important to note, however, that while this pipeline improves the fitting of TPCs, model fitting  
216 cannot fix poor data. In many experimental studies, the ideal approach to analysing TPCs would  
217 be with non-linear mixed effect models. This can be done using the *R* package *nlme* (Oddi, Miguez,  
218 Ghermandi, Bianchi, & Garibaldi, 2019), but Bayesian approaches have quickly become the  
219 easiest way to fit these types of models in *R*. Additional functionality of *rTPC* would be to output  
220 formatted code of the model equation, start parameters, and parameter limits that could be used by  
221 *brms*, a package that fits Bayesian multilevel models (Bürkner, 2017). However, even without this

222 feature, this pipeline gives any user the ability to analyse their own data, and the flexibility to  
223 incorporate additional approaches and analyses.

224

## 225 **Acknowledgements**

226 DP was funded by a NERC standard grant and by the University of Exeter and SP was funded by  
227 NERC grants (NE/S000348/1 and NE/M020843/1).

228

## 229 **Author contributions**

230 DP conceived the ideas and designed the pipeline. DP authored the *R* package and wrote the initial  
231 draft. All authors contributed to developing the manuscript and gave final approval for publication.

232

## 233 **References**

234 Angilletta Jr, M.J. (2006). Estimating and comparing thermal performance curves. *Journal of*  
235 *Thermal Biology*, 31(7),541–545.

236 Baty, F., Ritz, C., Charles, S., Brutsche, M., Flandrois, J.-P., & Delignette-Muller, M.-L. (2015).  
237 A toolbox for nonlinear regression in R: the package nlstools. *Journal of Statistical*  
238 *Software*, 66(5),1–21.

239 Bürkner, P.-C. (2017). brms: An R package for Bayesian multilevel models using Stan. *Journal*  
240 *of Statistical Software*, 80(1),1–28.

241 Burnham, K.P., & Anderson, D.R. (2002). A practical information-theoretic approach. *Model*  
242 *Selection and Multimodel Inference*, 2nd Ed. Springer, New York, 2.

- 243 Cohen, J.M., Venesky, M.D., Sauer, E.L., Civitello, D.J., McMahon, T.A., Roznik, E.A., &  
244 Rohr, J.R. (2017). The thermal mismatch hypothesis explains host susceptibility to an  
245 emerging infectious disease. *Ecology Letters*, 20(2),184–193.
- 246 Davison, A.C., & Hinkley, D.V. (1997). *Bootstrap methods and their application*. Cambridge  
247 university press.
- 248 DeLong, J.P., Gibert, J.P., Luhring, T.M., Bachman, G., Reed, B., Neyer, A., & Montooth, K.L.  
249 (2017). The combined effects of reactant kinetics and enzyme stability explain the  
250 temperature dependence of metabolic rates. *Ecology and Evolution*, 7(11),3940–3950.
- 251 Fox, J. (2006). Car: companion to applied regression. *R Package*.
- 252 Kontopoulos, D.-G., García-Carreras, B., Sal, S., Smith, T.P., & Pawar, S. (2018). Use and  
253 misuse of temperature normalisation in meta-analyses of thermal responses of biological  
254 traits. *PeerJ*, 6,e4363.
- 255 Krenek, S., Berendonk, T.U., & Petzoldt, T. (2011). Thermal performance curves of *Paramecium*  
256 *caudatum*: a model selection approach. *European Journal of Protistology*, 47(2),124–  
257 137.
- 258 Low-Décarie, E., Boatman, T.G., Bennett, N., Passfield, W., Gavalás-Olea, A., Siegel, P., &  
259 Geider, R.J. (2017). Predictions of response to temperature are contingent on model  
260 choice and data quality. *Ecology and Evolution*, 7(23),10467–10481.
- 261 Molnár, P.K., Kutz, S.J., Hoar, B.M., & Dobson, A.P. (2013). Metabolic approaches to  
262 understanding climate change impacts on seasonal host-macroparasite dynamics. *Ecology*  
263 *Letters*, 16(1),9–21.

- 264 Montagnes, D.J., Morgan, G., Bissinger, J.E., Atkinson, D., & Weisse, T. (2008). Short-term  
265 temperature change may impact freshwater carbon flux: a microbial perspective. *Global*  
266 *Change Biology*, *14*(12),2823–2838.
- 267 Mordecai, E.A., Caldwell, J.M., Grossman, M.K., Lippi, C.A., Johnson, L.R., Neira, M., ...  
268 Shocket, M.S. (2019). Thermal biology of mosquito-borne disease. *Ecology Letters*,  
269 *22*(10),1690–1708.
- 270 Oddi, F.J., Miguez, F.E., Ghermandi, L., Bianchi, L.O., & Garibaldi, L.A. (2019). A nonlinear  
271 mixed-effects modeling approach for ecological data: Using temporal dynamics of  
272 vegetation moisture as an example. *Ecology and Evolution*, *9*(18),10225–10240.
- 273 Padfield, D., & Matheson, G. (2018). nls.multstart: Robust Non-Linear Regression using AIC  
274 Scores. R package version 1.0.0. (Version 1.0.0.).
- 275 Pawar, S., Dell, A.I., Savage, V.M., & Knies, J.L. (2016). Real versus artificial variation in the  
276 thermal sensitivity of biological traits. *The American Naturalist*, *187*(2),E41–E52.
- 277 Rebaudo, F., Struelens, Q., & Dangles, O. (2018). Modelling temperature-dependent  
278 development rate and phenology in arthropods: The devRate package for r. *Methods in*  
279 *Ecology and Evolution*, *9*(4),1144–1150. doi:10.1111/2041-210X.12935
- 280 Schaum, C.-E., Barton, S., Bestion, E., Buckling, A., Garcia-Carreras, B., Lopez, P., ... Yvon-  
281 Durocher, G. (2017). Adaptation of phytoplankton to a decade of experimental warming  
282 linked to increased photosynthesis. *Nature Ecology & Evolution*, *1*(4),0094.  
283 doi:10.1038/s41559-017-0094
- 284 Shi, P., & Ge, F. (2010). A comparison of different thermal performance functions describing  
285 temperature-dependent development rates. *Journal of Thermal Biology*, *35*(5),225–231.

286 Sinclair, B.J., Marshall, K.E., Sewell, M.A., Levesque, D.L., Willett, C.S., Slotsbo, S., ...  
287 Helmuth, B.S. (2016). Can we predict ectotherm responses to climate change using  
288 thermal performance curves and body temperatures? *Ecology Letters*, *19*(11),1372–1385.  
289 Smith, T.P., Thomas, T.J., García-Carreras, B., Sal, S., Yvon-Durocher, G., Bell, T., & Pawar, S.  
290 (2019). Community-level respiration of prokaryotic microbes may rise with global  
291 warming. *Nature Communications*, *10*(1),1–11.  
292 Sunday, J.M., Bates, A.E., & Dulvy, N.K. (2012). Thermal tolerance and the global  
293 redistribution of animals. *Nature Climate Change*, *2*(9),686–690.  
294 doi:10.1038/nclimate1539  
295

296 **Figures & Tables**

297 **Table 1: Overview of helper functions included in *rTPC*.**

| <b>Function</b>                | <b>Description</b>                                                                                                                                                  |
|--------------------------------|---------------------------------------------------------------------------------------------------------------------------------------------------------------------|
| <i>get_model_names()</i>       | Lists the models available in rTPC.                                                                                                                                 |
| <i>get_start_vals()</i>        | Estimates start values given the temperature, rate values and model selected.                                                                                       |
| <i>get_lower_lims()</i>        | Sets lower limits given the data and the model selected.                                                                                                            |
| <i>get_upper_lims()</i>        | Sets upper limits given the data and the model selected.                                                                                                            |
| <i>get_ctmax()</i>             | Estimates the critical thermal maximum of the model fit. Where the predicted rate can never be 0, the temperature at which the rate is 5% of $r_{max}$ is returned. |
| <i>get_ctmin()</i>             | Estimates the critical thermal minimum of the model fit. Where the predicted rate can never be 0, the temperature at which the rate is 5% of $r_{max}$ is returned. |
| <i>get_e()</i>                 | Estimates the activation energy of the model fit.                                                                                                                   |
| <i>get_eh()</i>                | Estimates the deactivation energy of a thermal performance curve.                                                                                                   |
| <i>get_q10()</i>               | Estimates the Q <sub>10</sub> value of a thermal performance curve.                                                                                                 |
| <i>get_topt()</i>              | Estimates the optimum temperature.                                                                                                                                  |
| <i>get_rmax()</i>              | Estimates the rate at optimum temperature.                                                                                                                          |
| <i>get_skewness()</i>          | Estimates skewness of a thermal performance curve.                                                                                                                  |
| <i>get_thermalsafetymargin</i> | Estimates the thermal safety margin of a thermal performance curve ( $CT_{max} - T_{opt}$ ).                                                                        |
| <i>get_thermaltolerance()</i>  | Estimate the thermal tolerance of a thermal performance curve ( $CT_{max} - CT_{min}$ ).                                                                            |
| <i>get_breadth()</i>           | Estimated thermal performance breadth of a thermal performance curve.                                                                                               |
| <i>calc_params()</i>           | Returns a table of all the estimated parameters.                                                                                                                    |

298

299

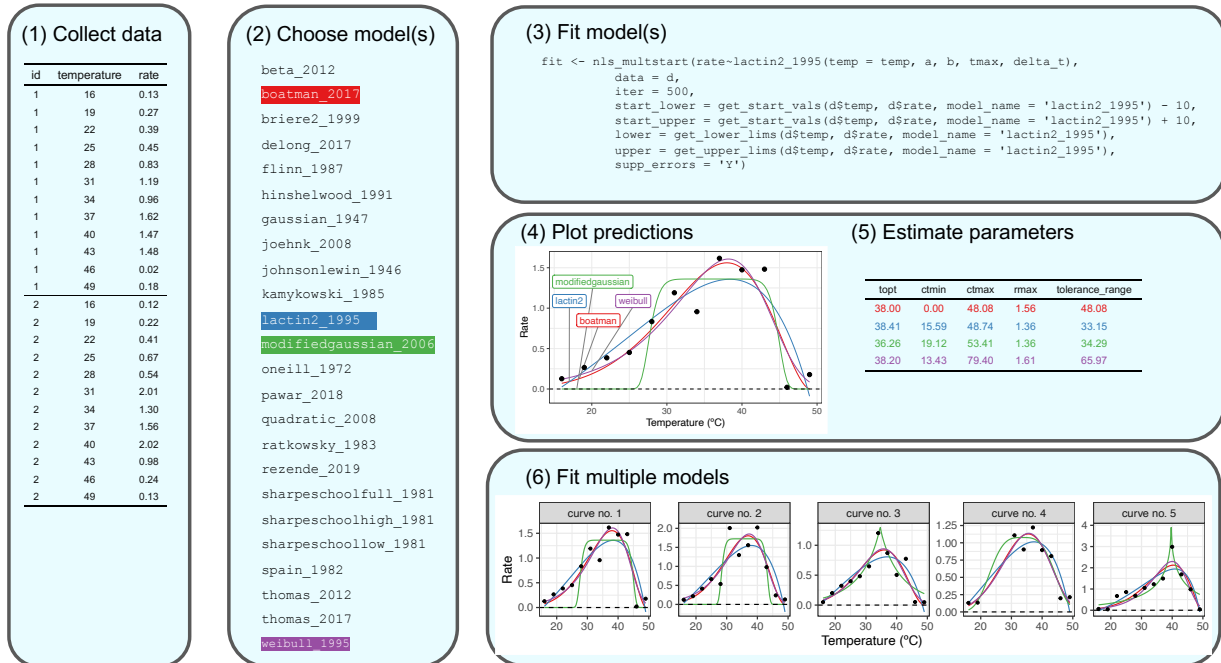

300

301 **Figure 1. General pipeline for fitting thermal performance curves using *rTPC*.** (1) Collect,  
 302 check, and present data in long format. (2) Choose which models from *rTPC* to be use. Here, a  
 303 random assortment of four models were chosen. (3) Fit the models using *nls.multistart* and helper  
 304 functions from *rTPC*. (4) Models can be visualised and (5) common traits of TPCs can be estimated  
 305 using *rTPC::calc\_params()*. (6) This simple pipeline can be scaled up to be used on multiple  
 306 curves.



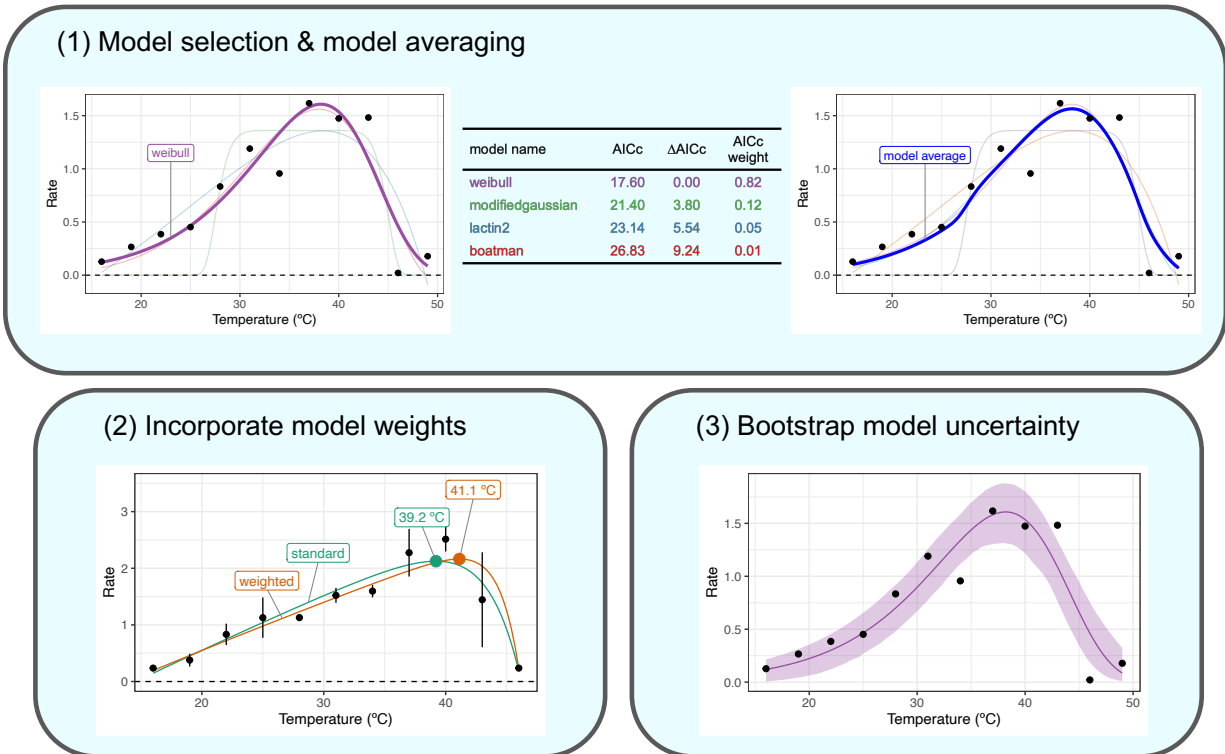

307

308 **Figure 2. Potential applications for fitting thermal performance curves using *rTPC*.** (1) AICc  
309 scores of model fits can be calculated to help with model selection or model averaging. (2) If TPCs  
310 are fit to averages of replicates, weighted NLLS can be used to reduce parameter bias. (3) After  
311 the model has been fitted, non-parametric bootstrapping can estimate model uncertainty and  
312 confidence intervals for parameters.

# Supplementary Information: *rTPC* and *nls.multstart*: a new pipeline to fit thermal performance curves in *R*.

## Author(s) Affiliations:

Daniel Padfield<sup>1\*</sup>, Hannah O’Sullivan<sup>2</sup>, & Samraat Pawar<sup>2</sup>

<sup>1</sup>College of Life and Environmental Sciences, Environment and Sustainability Institute, University of Exeter, Penryn, Cornwall, TR10 9EZ, U.K.

<sup>2</sup>Department of Life Sciences, Imperial College London, Silwood Park Campus, Buckhurst Road, Ascot, Berkshire, SL5 7PY, U.K.

**Corresponding author:** Daniel Padfield [d.padfield@exeter.ac.uk](mailto:d.padfield@exeter.ac.uk)

Table 1: Summary of equations available in rTPC

| Function                | Equation                                                                                                                                                                                                                                                     | Parameters                            | Allow negative rates   |                         | Reference              |
|-------------------------|--------------------------------------------------------------------------------------------------------------------------------------------------------------------------------------------------------------------------------------------------------------|---------------------------------------|------------------------|-------------------------|------------------------|
|                         |                                                                                                                                                                                                                                                              | Number: Names                         | <i>pre</i> – $T_{opt}$ | <i>post</i> – $T_{opt}$ |                        |
| beta_2012()             | $rate = \frac{a \left( \frac{temp - b + \frac{c(d-1)}{d+e-2}}{c} \right)^{d-1} \cdot \left( 1 - \frac{temp - b + \frac{c(d-1)}{d+e-2}}{c} \right)^{e-1}}{\left( \frac{d-1}{d+e-2} \right)^{d-1} \cdot \left( \frac{e-1}{d+e-2} \right)^{e-1}}$               | 5 : $a, b, c, d, e$                   | ✗                      | ✗                       | Niehaus (2012) [1]     |
| boatman_2017()          | $rate = r_{max} \cdot \left( \sin\left(\pi \left( \frac{temp - t_{min}}{t_{max} - t_{min}} \right)^a \right) \right)^b$                                                                                                                                      | 5 : $r_{max}, t_{min}, t_{max}, a, b$ | ✗                      | ✗                       | Boatman (2017) [2]     |
| briere2_1999()          | $rate = a \cdot temp \cdot (temp - t_{min}) \cdot (t_{max} - temp)^{\frac{1}{b}}$                                                                                                                                                                            | 4 : $t_{min}, t_{max}, a, b$          | ✓                      | ✗                       | Brière (1999) [3]      |
| delong_2017()           | $rate = c \cdot \exp \frac{-\left( e_b - \left( e_f \left( 1 - \frac{temp + 273.15}{t_m} \right) + e_{hc} \cdot \left( (temp + 273.15) - t_m - (temp + 273.15) \cdot \ln \left( \frac{temp + 273.15}{t_m} \right) \right) \right)}{k \cdot (temp + 273.15)}$ | 5 : $c, e_b, e_f, t_m, e_{hc}$        | ✗                      | ✗                       | DeLong (2017) [4]      |
| flinn_1991()            | $rate = \frac{1}{1 + a + b \cdot temp + c \cdot temp^2}$                                                                                                                                                                                                     | 3 : $a, b, c$                         | ✗                      | ✗                       | Flinn (1991) [5]       |
| gaussian_1987()         | $rate = r_{max} \cdot \exp \left( -0.5 \left( \frac{ temp - t_{opt} }{a} \right)^2 \right)$                                                                                                                                                                  | 3 : $r_{max}, t_{opt}, a$             | ✗                      | ✗                       | Lynch (1987) [6]       |
| hinshelwood_1947()      | $rate = a \cdot \exp \frac{-e}{k \cdot (temp + 273.15)} - b \cdot \exp \frac{-e_h}{k \cdot (temp + 273.15)}$                                                                                                                                                 | 4 : $a, e, b, e_h$                    | ✗                      | ✓                       | Hinshelwood (1947) [7] |
| joehnk_2008()           | $rate = r_{max} \left( 1 + a \left( \left( b^{temp - t_{opt}} - 1 \right) - \frac{\ln(b)}{\ln(c)} \left( c^{temp - t_{opt}} - 1 \right) \right) \right)$                                                                                                     | 5 : $r_{max}, t_{opt}, a, b, c$       | ✓                      | ✓                       | Jöhnk (2008) [8]       |
| johnsonlewin_1946()     | $rate = \frac{r_0 \cdot \exp \frac{-e}{k \cdot (temp + 273.15)}}{1 + \exp \frac{e_h - \left( \frac{e_h}{(t_{opt} + 273.15)} + k \cdot \ln \left( \frac{e}{e_h - e} \right) \right) \cdot (temp + 273.15)}{k \cdot (temp + 273.15)}}$                         | 4 : $r_0, e, e_h, t_{opt}$            | ✗                      | ✗                       | Johnson (1946) [9]     |
| kamykowski_1985()       | $rate = a \cdot \left( 1 - \exp^{-b \cdot (temp - t_{min})} \right) \cdot \left( 1 - \exp^{-c \cdot (t_{max} - temp)} \right)$                                                                                                                               | 5 : $t_{min}, t_{max}, a, b, c$       | ✓                      | ✓                       | Kamykowski (1985) [10] |
| lactin2_1995()          | $rate = \exp^{a \cdot temp} - \exp^{a \cdot t_{max} - \left( \frac{t_{max} - temp}{\Delta t} \right)} + b$                                                                                                                                                   | 4 : $a, b, t_{max}, \Delta t$         | ✓                      | ✓                       | Lactin (1995) [10]     |
| modifiedgaussian_2006() | $rate = r_{max} \cdot \exp \left( -0.5 \left( \frac{ temp - t_{opt} }{a} \right)^b \right)$                                                                                                                                                                  | 4 : $r_{max}, t_{opt}, a, b$          | ✗                      | ✗                       | Angilletta (2006) [11] |

bioRxiv preprint doi: <https://doi.org/10.1101/2020.12.16.423089>; this version posted December 16, 2020. The copyright holder for this preprint (which was not certified by peer review) is the author/funder, who has granted bioRxiv a license to display the preprint in perpetuity. It is made available under aCC-BY 4.0 International license.

Table 1: Summary of equations available in rTPC continued

| Function                | Equation                                                                                                                                                                                                                                                                   | Parameters                                     | Allow negative rates |                  | Reference               |
|-------------------------|----------------------------------------------------------------------------------------------------------------------------------------------------------------------------------------------------------------------------------------------------------------------------|------------------------------------------------|----------------------|------------------|-------------------------|
|                         |                                                                                                                                                                                                                                                                            | Number: Names                                  | $pre - T_{opt}$      | $post - T_{opt}$ |                         |
| oneill_1972()           | $rate = r_{max} \cdot \left( \frac{ct_{max} - temp}{ct_{max} - t_{opt}} \right)^x \cdot exp^{x \cdot \frac{temp - t_{opt}}{ct_{max} - t_{opt}}}$ $where : x = \frac{w^2}{400} \cdot (1 + \sqrt{1 + \frac{40}{w}})^2$ $and : w = (q_{10} - 1) \cdot (ct_{max} - t_{opt})$   | 4 : $r_{max}, ct_{max}, t_{opt}, q_{10}$       | ✗                    | ✗                | O'Neill (1972) [12]     |
| pawar_2018()            | $rate = \frac{r_{tref} \cdot exp^{-\frac{e}{k} \left( \frac{1}{temp+273.15} - \frac{1}{t_{ref}+273.15} \right)}}{1 + \left( \frac{e}{ch-e} \right) \cdot exp^{\frac{e_h}{k} \left( \frac{1}{t_{opt}+273.15} - \frac{1}{temp+273.15} \right)}}$                             | 4 : $r_{tref}, e, e_h, t_{opt}, t_{ref}$       | ✗                    | ✗                | Kontopoulos (2018)      |
| quadratic_2008()        | $rate = a + b \cdot temp + c \cdot temp^2$                                                                                                                                                                                                                                 | 3 : $a, b, c$                                  | ✓                    | ✓                | Montagnes (2008)        |
| ratkowsky_1983()        | $rate = (a \cdot (temp - t_{min}))^2 \cdot (1 - exp(b \cdot (temp - t_{max})))^2$                                                                                                                                                                                          | 4 : $t_{min}, t_{max}, a, b$                   | ✗                    | ✗                | Ratkowsky (1983)        |
| rezende_2019()          | $\text{if } temp < b : rate = a \cdot 10^{\frac{\log_{10}(q_{10})}{\left(\frac{10}{temp}\right)}}$ $\text{if } temp > b : rate = a \cdot 10^{\frac{\log_{10}(q_{10})}{\left(\frac{10}{temp}\right)}} \cdot (1 - c \cdot (b - temp)^2)$                                     | 4 : $q_{10}, a, b, c$                          | ✗                    | ✓                | Rezende (2019) [15]     |
| sharpeschoolfull_1981() | $rate = \frac{r_{tref} \cdot exp^{-\frac{e}{k} \left( \frac{1}{temp+273.15} - \frac{1}{t_{ref}+273.15} \right)}}{1 + exp^{\frac{e_l}{k} \left( \frac{1}{t_l} - \frac{1}{temp+273.15} \right)} + exp^{\frac{e_h}{k} \left( \frac{1}{t_h} - \frac{1}{temp+273.15} \right)}}$ | 6 : $r_{tref}, e, e_l, t_l, e_h, t_h, t_{ref}$ | ✗                    | ✗                | Schoolfield (1981)      |
| sharpeschoolhigh_1981() | $rate = \frac{r_{tref} \cdot exp^{-\frac{e}{k} \left( \frac{1}{temp+273.15} - \frac{1}{t_{ref}+273.15} \right)}}{1 + exp^{\frac{e_h}{k} \left( \frac{1}{t_h} - \frac{1}{temp+273.15} \right)}}$                                                                            | 4 : $r_{tref}, e, e_h, t_h, t_{ref}$           | ✗                    | ✗                | Schoolfield (1981)      |
| sharpeschoollow_1981()  | $rate = \frac{r_{tref} \cdot exp^{-\frac{e}{k} \left( \frac{1}{temp+273.15} - \frac{1}{t_{ref}+273.15} \right)}}{1 + exp^{\frac{e_l}{k} \left( \frac{1}{t_l} - \frac{1}{temp+273.15} \right)}}$                                                                            | 4 : $r_{tref}, e, e_l, t_l, t_{ref}$           | ✗                    | ✗                | Schoolfield (1981) [16] |
| spain_1982()            | $rate = r_0 \cdot exp^{a \cdot temp} \cdot (1 - b \cdot exp^{c \cdot temp})$                                                                                                                                                                                               | 4 : $a, b, c, r_0$                             | ✗                    | ✓                | Spain (1982) [18]       |
| thomas_2012()           | $rate = a \cdot exp^{b \cdot temp} \left( 1 - \left( \frac{temp - t_{opt}}{c} \right)^2 \right)$                                                                                                                                                                           | 4 : $a, b, c, t_{opt}$                         | ✓                    | ✓                | Thomas (2012) [19]      |
| thomas_2017()           | $rate = a \cdot exp^{b \cdot temp} - (c + d \cdot exp^{e \cdot temp})$                                                                                                                                                                                                     | 5 : $a, b, c, d, e$                            | ✓                    | ✓                | Thomas (2017) [20]      |
| weibull_1995()          | $rate = a \cdot \left( \frac{c-1}{c} \right)^{\frac{1-c}{c}} \left( \frac{temp - t_{opt}}{b} + \left( \frac{c-1}{c} \right)^{\frac{1}{c}} \right)^{c-1} exp^{-\left( \frac{temp - t_{opt}}{b} + \left( \frac{c-1}{c} \right)^{\frac{1}{c}} \right)^c} + \frac{c-1}{c}$     | 4 : $a, t_{opt}, b, c$                         | ✗                    | ✗                | Angilletta (1995) [17]  |

## References

- [1] Amanda C. Niehaus, Michael J. Angilletta, Michael W. Sears, Craig E. Franklin, and Robbie S. Wilson. Predicting the physiological performance of ectotherms in fluctuating thermal environments. *Journal of Experimental Biology*, 215(4):694–701, 2012.
- [2] Tobias G. Boatman, Tracy Lawson, and Richard J. Geider. A key marine diazotroph in a changing ocean: The interacting effects of temperature, Co<sub>2</sub> and light on the growth of trichodesmium erythraeum IMS101. *PLoS ONE*, 12(1):1–20, 2017.
- [3] Jean-Francois Briere, Pascale Pracros, Alain-Yves Le Roux, and Jean-sebastien Pierre. A Novel Rate Model of Temperature-Dependent Development for Arthropods. *Environmental Entomology*, 28(1):22–29, 1999.
- [4] John P DeLong, Jean P Gibert, Thomas M Luhning, Gwendolyn Bachman, Benjamin Reed, Abigail Neyer, and KL Montooth. The combined effects of reactant kinetics and enzyme stability explain the temperature dependence of metabolic rates. *Ecology and Evolution*, 7(11):3940–3950, 2017.
- [5] P. W. Flinn. Temperature-dependent functional response of the parasitoid *Cephalonomia waterstoni* (Gahan) (Hymenoptera: Bethyilidae) attacking rusty grain beetle larvae (Coleoptera: Cucujidae). *Environmental Entomology*, 20(6):872–876, 1991.
- [6] Michael Lynch and Wilfried Gabriel. Environmental tolerance. *The American Naturalist*, 129(2):283–303, 1987.
- [7] Cyril Norman Hinshelwood et al. Chemical kinetics of the bacterial cell. 1946.
- [8] Klaus D. Jöhnk, Jef Huisman, Jonathan Sharples, Ben Sommeijer, Petra M. Visser, and Jasper M. Stroom. Summer heatwaves promote blooms of harmful cyanobacteria. *Global Change Biology*, 14(3):495–512, 2008.
- [9] Frank H Johnson and Isaac Lewin. The growth rate of e. coli in relation to temperature, quinine and coenzyme. *Journal of Cellular and Comparative Physiology*, 28(1):47–75, 1946.
- [10] Derek J Lactin, NJ Holliday, DL Johnson, and R Craigen. Improved rate model of temperature-dependent development by arthropods. *Environmental entomology*, 24(1):68–75, 1995.
- [11] Michael J. Angilletta. Estimating and comparing thermal performance curves. *Journal of Thermal Biology*, 31(7):541–545, 2006.
- [12] RV O’Neill, RA Goldstein, HH Shugart, JB Mankin, and RS Booth. Terrestrial ecosystem energy model, eastern deciduous forest biome. *Int. Biol. Program Memo Report*, pages 72–19, 1972.
- [13] Dimitrios Georgios Kontopoulos, Bernardo García-Carreras, Sofía Sal, Thomas P. Smith, and Samraat Pawar. Use and misuse of temperature normalisation in meta-analyses of thermal responses of biological traits. *PeerJ*, 2018(2):1–18, 2018.
- [14] David J.S. Montagnes, Gareth Morgan, Jan E. Bissinger, David Atkinson, and Thomas Weisse. Short-term temperature change may impact freshwater carbon flux: A microbial perspective. *Global Change Biology*, 14(12):2823–2838, 2008.

- [15] D. A. Ratkowsky, R. K. Lowry, T. A. McMeekin, A. N. Stokes, and R. E. Chandler. Model for bacterial culture growth rate throughout the entire biokinetic temperature range. *Journal of Bacteriology*, 154(3):1222–1226, 1983.
- [16] Enrico L. Rezende and Francisco Bozinovic. Thermal performance across levels of biological organization. *Philosophical Transactions of the Royal Society B: Biological Sciences*, 374(1778), 2019.
- [17] Robert M Schoolfield, PJH Sharpe, and Charles E Magnuson. Non-linear regression of biological temperature-dependent rate models based on absolute reaction-rate theory. *Journal of theoretical biology*, 88(4):719–731, 1981.
- [18] James D Spain. Microcomputers for teaching simulation to undergraduate science students. *Simulation & Games*, 14(1):87–94, 1983.
- [19] Mridul K. Thomas, Colin T. Kremer, Christopher A. Klausmeier, and Elena Litchman. A global pattern of thermal adaptation in marine phytoplankton. *Science*, 338(6110):1085–1088, 2012.
- [20] Mridul K. Thomas, María Aranguren-Gassis, Colin T. Kremer, Marilyn R. Gould, Krista Anderson, Christopher A. Klausmeier, and Elena Litchman. Temperature–nutrient interactions exacerbate sensitivity to warming in phytoplankton. *Global Change Biology*, 23(8):3269–3280, 2017.
